# Supplementary material for: The Functional Relationship between NADPH Thioredoxin Reductase C, 2-Cys Peroxiredoxins, and m-Type Thioredoxins in the Regulation of Calvin–Benson Cycle and Malate-Valve Enzymes in Arabidopsis
Source: MDPI journal article supplement (doi:10.3390/antiox12051041), 2023-05-03
Supplement: s1 [file s1]

**Table S1.** Primers used for genotyping the mutant lines analysed in this work.

| Gene                 | Locus     | Primer name | Sequence (5'-3')      |
|----------------------|-----------|-------------|-----------------------|
| <b><i>NTRC</i></b>   | At2g41680 | NTRC-Fsalk  | TCACCAACATGTGGCCC     |
|                      |           | NTRC-Rsalk  | TTCTTCATCTTCACACCCGA  |
| <b><i>Trx m1</i></b> | At1g03680 | 5Atm1       | GGGCTTTAATGAAACTGCGG  |
|                      |           | 3Atm1       | ACGGGAAGTACACGTGTAAG  |
| <b><i>Trx m2</i></b> | At4g03520 | 5Atm2       | CTTTGATTCTGTGCTCGTTGG |
|                      |           | 3Atm2       | ATCTGAGTAGGTACCCAACC  |
| <b><i>Trx m4</i></b> | At3g15360 | 5Atm4-2     | GAGCCCAAATACAGCAAACC  |
|                      |           | 3Atm4-2     | GAAGAAGACAAAGAGGACCC  |
| <b><i>2cpa</i></b>   | At3g11630 | 2cpaGK-RP   | CTTCCACTGGTTGGAAACAAG |
|                      |           | 2cpaGK-LP   | AATGCCTGCAACATTGAAAAC |
| <b><i>2cpb</i></b>   | At5g06290 | 2cpb-F1     | CCACCTGAACCAAGAAAG    |
|                      |           | 2cpb-R1     | CCTGCAAGACAACATCAC    |
| <b>SALK T-DNA</b>    | T-DNA     | Lb1.3       | ATTTTGCCGATTTTCGGAAC  |

**Table S2.** Primers used for gene expression analysis by RT-qPCR.

| Gene                 | Locus     | Primer name  | Sequence (5'-3')              |
|----------------------|-----------|--------------|-------------------------------|
| <b><i>NTRC</i></b>   | At2g41680 | q-NTRC-F1    | TGAAGATGAAGAAAGAGTACCGAG      |
|                      |           | q-NTRC-R1    | GGTGTCTCCTCATTTATTGGCCT       |
| <b><i>Trx m1</i></b> | At1g03680 | AtTRXM1-qfor | AATTCTAGGGTTTCCCGATTACG       |
|                      |           | AtTRXM1-qrev | GAGTCCCATGTTGAATCGTTGA        |
| <b><i>Trx m2</i></b> | At4g03520 | AtTRXM2-qfor | TCTCCGGCTTCGTTGACC            |
|                      |           | AtTRXM2-qrev | GAGCTTCACAGACGACGGCT          |
| <b><i>Trx m4</i></b> | At3g15360 | AtTRXM4-qfor | AATCGCTCGCGGTGAC              |
|                      |           | AtTRXM4-qrev | GATTTGGTACTTCGACGGCG          |
| <b><i>Trx f1</i></b> | At3g02730 | TRX f1 qFw   | CGATGATCTGGTTGCAGCG           |
|                      |           | TRX f1 qRv   | CTGGTTCATCCGGAAGCAG           |
| <b><i>Trx f2</i></b> | At5g16400 | TRX f2 qFw   | TGTAACCAAGACAACAAGCCA         |
|                      |           | TRX f2 qRv   | CGGTCACTTCCTTTACTACCT         |
| <b><i>Actin</i></b>  | At3g18780 | Act-qFor     | GCACTTGCACCAAGCAGCAT          |
|                      |           | Act-qRev     | CCTTTCAGGTGGTGCAACGAC         |
| <b><i>Ubq10</i></b>  | At4g05320 | UBQ10-qfor   | GGCCTTGTATAATCCCTGATGAATAAG   |
|                      |           | UBQ10-qrev   | AAAGAGATAACAGGAACGGAAACATAAGT |

**Table S3:** Oligonucleotides used for protein cloning in pQE30 vector. Restriction sites are underlined.

| Gene                   | Primer name      | Sequence (5'-3')                 |
|------------------------|------------------|----------------------------------|
| <b><i>Trx m1</i></b>   | Attrxm1-BamHIF   | CAGGATCCCTATCTTCACTCTCGAAGAATTCT |
|                        | Attrxm1-HindIIIR | CAAAGCTTTTACAAGAATTTGTTGATGCTGG  |
| <b><i>Trx m2</i></b>   | Attrxm2-BamHIF   | CCGGATCCTGTGAAGCTCAGGAACTACTAC   |
|                        | Attrxm2-HindIIIR | CAAAGCTTTCATGGCAAGAACTTGTCG      |
| <b><i>NADP-MDH</i></b> | NADPMDH-BamHIF   | CAGGATCCTGCTCCGTTTCTCAAATAG      |
|                        | NADPMDH-HindIIIR | CAAAGCTTTCAAACTTCCCCAGGAAG       |

Fig.S1

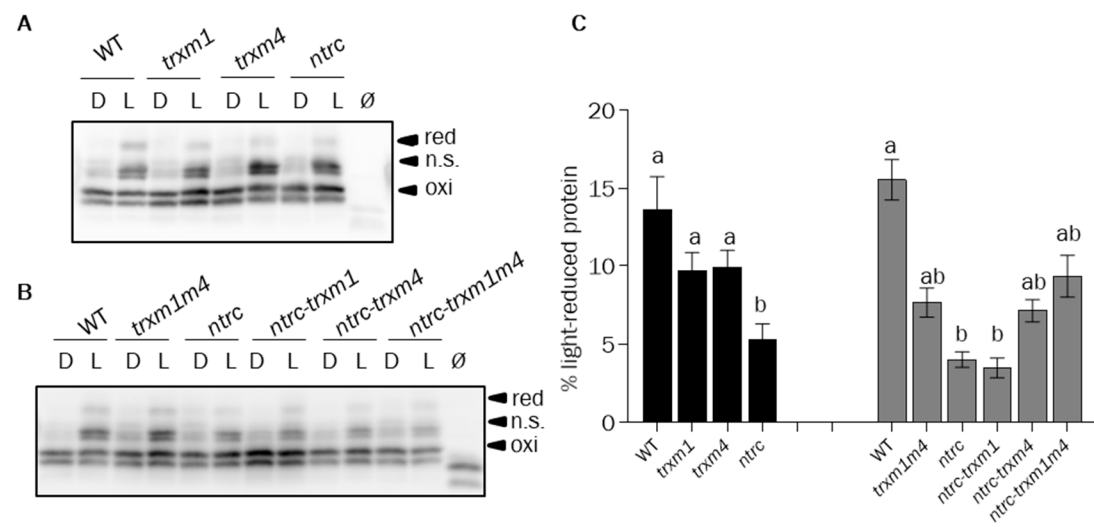

Fig. S2

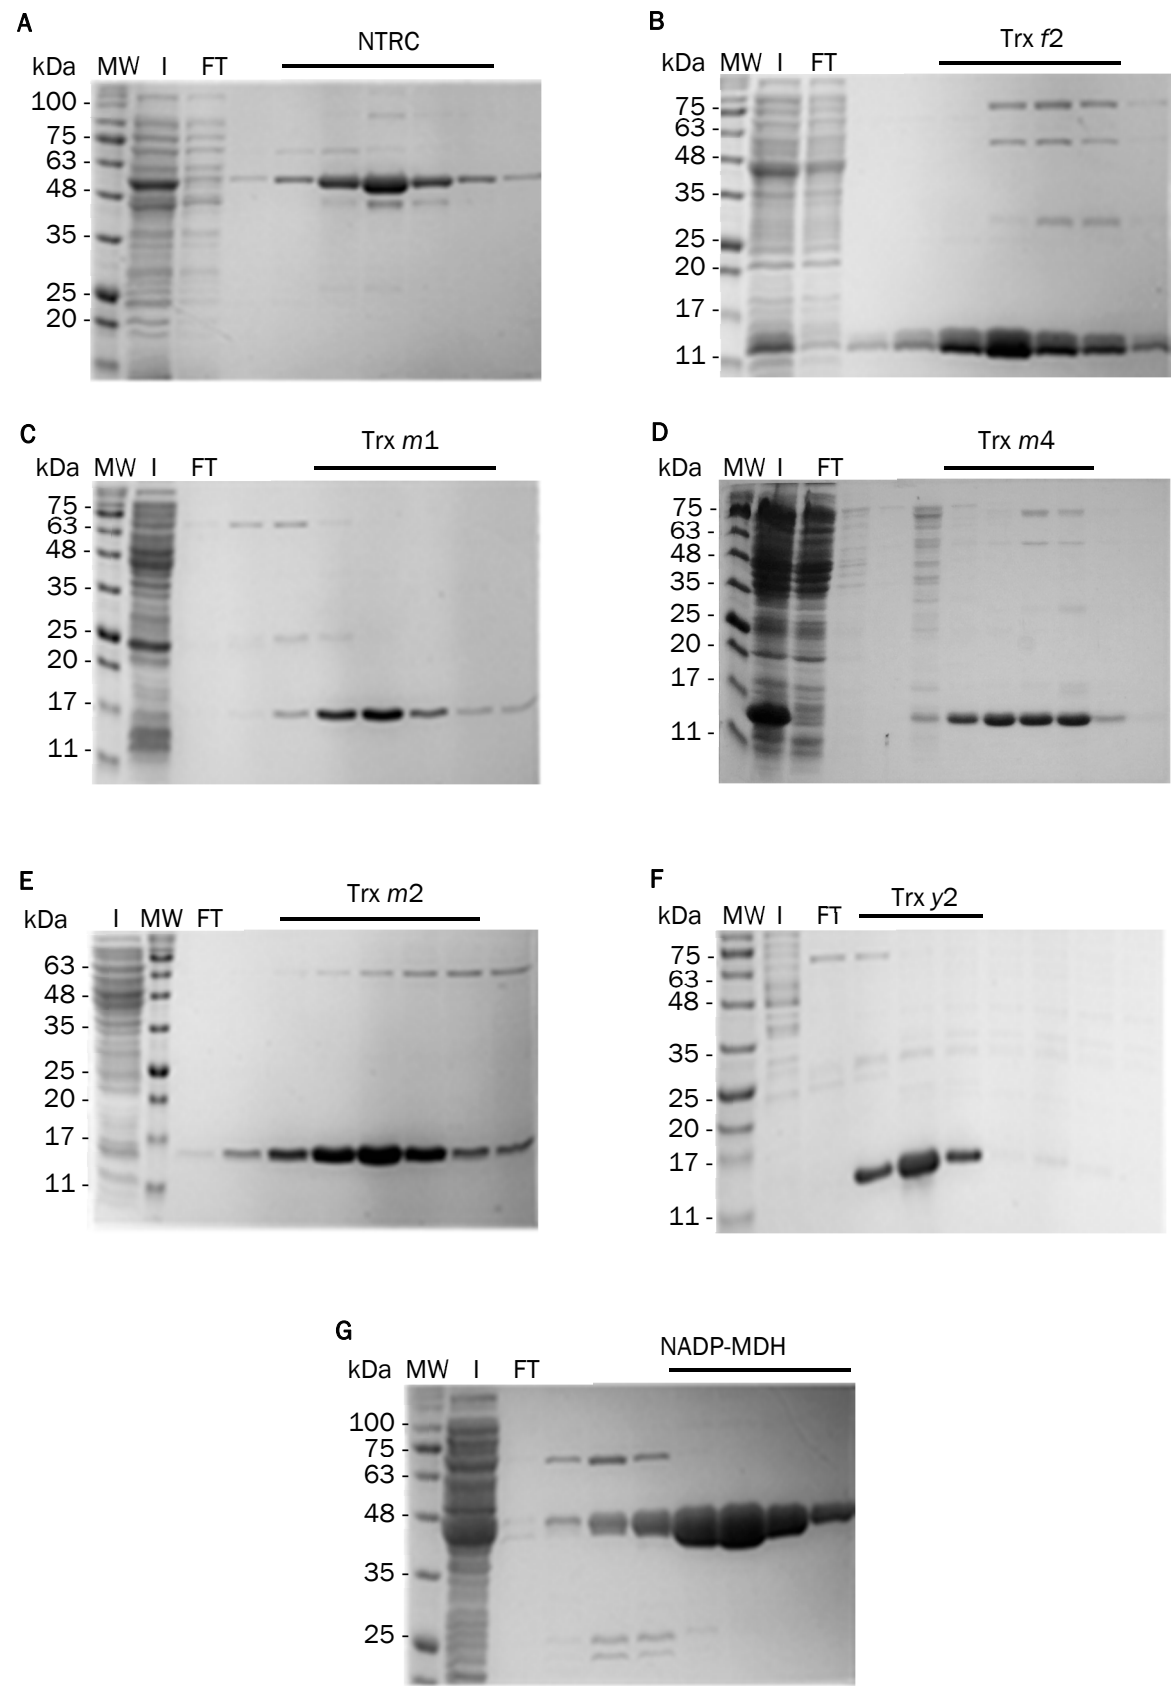

Fig. S3

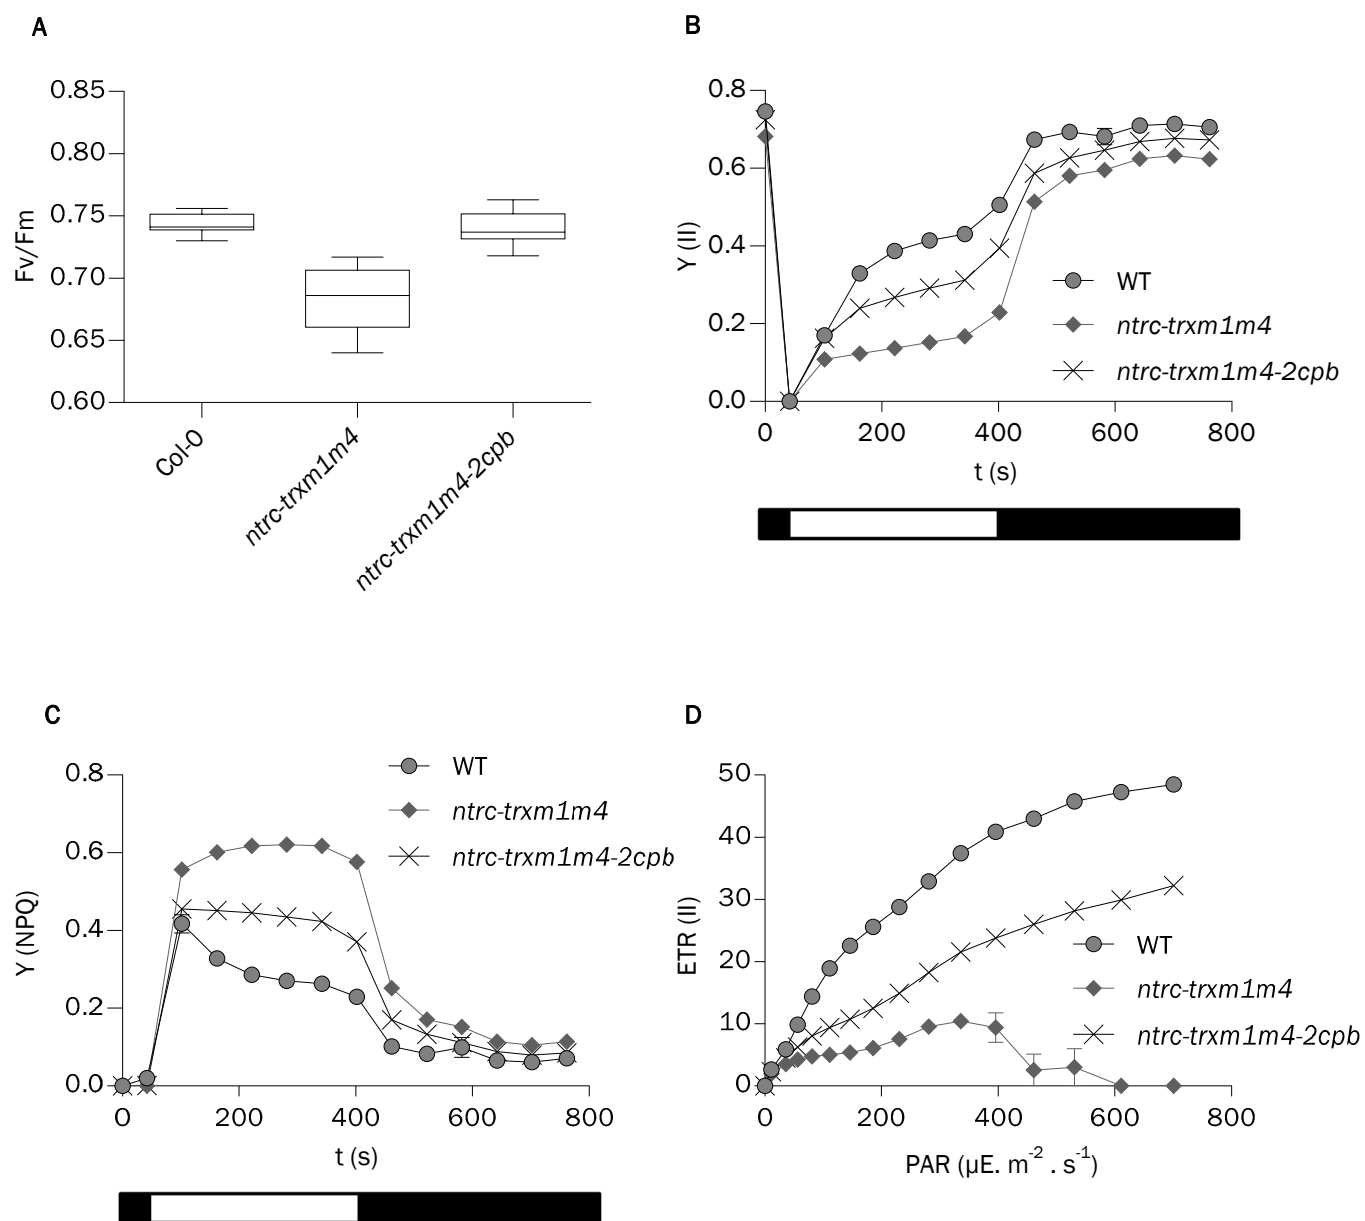

### Figure legends:

**Figure S1. Analysis of the *in vivo* redox state of Trxs *f* in plants lacking NTRC and/or Trxs *m*.** WT and mutant plants were grown under long-day conditions for 22 days at a light intensity of  $120 \mu\text{E}\cdot\text{m}^{-2}\text{s}^{-1}$ . Plants were incubated in darkness for 5 hours and dark-adapted samples were collected (D), then light was switched on and samples were taken after 30 min at a light intensity of  $480 \mu\text{E}\cdot\text{m}^{-2}\text{s}^{-1}$  (L). The *in vivo* redox state of Trxs *f* was determined in WT, single mutant plants (A, C), as well as multiple mutants (B, C). Proteins were extracted in the presence of 10% TCA to preserve the thiol redox state. Protein thiols were alkylated with 10 mM MM(PEG)<sub>24</sub> prior to electrophoresis in a 9.5% polyacrylamide gel (14% for Trxs *f*) under reducing conditions, transferred to a nitrocellulose membrane, and probed with the indicated antibodies. red, reduced; ox, oxidized; n.s., non-specific band. (C) The corresponding band intensities were quantified (GelAnalyzer), and the percentage of reduction is the ratio between the reduced form and the sum of reduced and oxidized forms for each protein. Each value is the mean of three independent experiments  $\pm$  SE. Letters indicate significant differences ( $P < 0.05$ ) determined by one-way ANOVA followed by Tukey's post-test.

**Figure S2: Protein purification.** Recombinant NTRC (A), Trx *f*2 (B), Trx *m*1 (C), Trx *m*4 (D), Trx *m*2 (E), Trx *y*2 (F) and NADP-MDH (G) were purified from the corresponding strains by  $\text{Ni}^{2+}$  affinity chromatography and the resulting fractions analysed by SDS-PAGE (9 to 15% acrylamide) under reducing conditions. MW, molecular weight marker; I, column input; FT, column flow through. Black bars indicate the fractions used for *in vitro* assays.

**Figure S3. Photosynthetic performance is restored in *ntrc-trxm1m4* plants by decreased levels of 2-Cys Prxs.** Photosynthetic parameters were measured on whole rosettes of the wild-type and mutant plants, as indicated, grown under long-day conditions for 21 days (A)  $F_v/F_m$  was determined in dark adapted plants. Box plots indicating the  $F_v/F_m$  value are shown. In each case, the median (segment inside rectangle), upper and lower quartiles (boxes), and minimum and maximum values (whiskers) are indicated. (B) Quantum yields of photosystem II photochemistry,  $Y(\text{II})$ , and (C) non-photochemical quenching,  $Y(\text{NPQ})$ . Each value is the average of four determinations, and mean values  $\pm$  SE are represented. White and black blocks indicate periods of illumination with actinic light ( $81 \mu\text{E m}^{-2} \text{s}^{-1}$ ) and darkness, respectively. (D) Relative ETRs of PSII,  $\text{ETR}(\text{II})$ , were determined during stepwise increase of photosynthetically active radiation (PAR) in 3 replicates and each data point is the mean  $\pm$  SE.
